# Supplementary material for: NOTCH and DNA repair pathways are more frequently targeted by genomic alterations in inflammatory than in non‐inflammatory breast cancers
Source: PubMed Central journal article supplement (PMC7053236; doi:10.1002/1878-0261.12621), 2020-02-05
Supplement: MOL2-14-504-s001.pdf [file MOL2-14-504-s001.pdf]

Figure S1

A

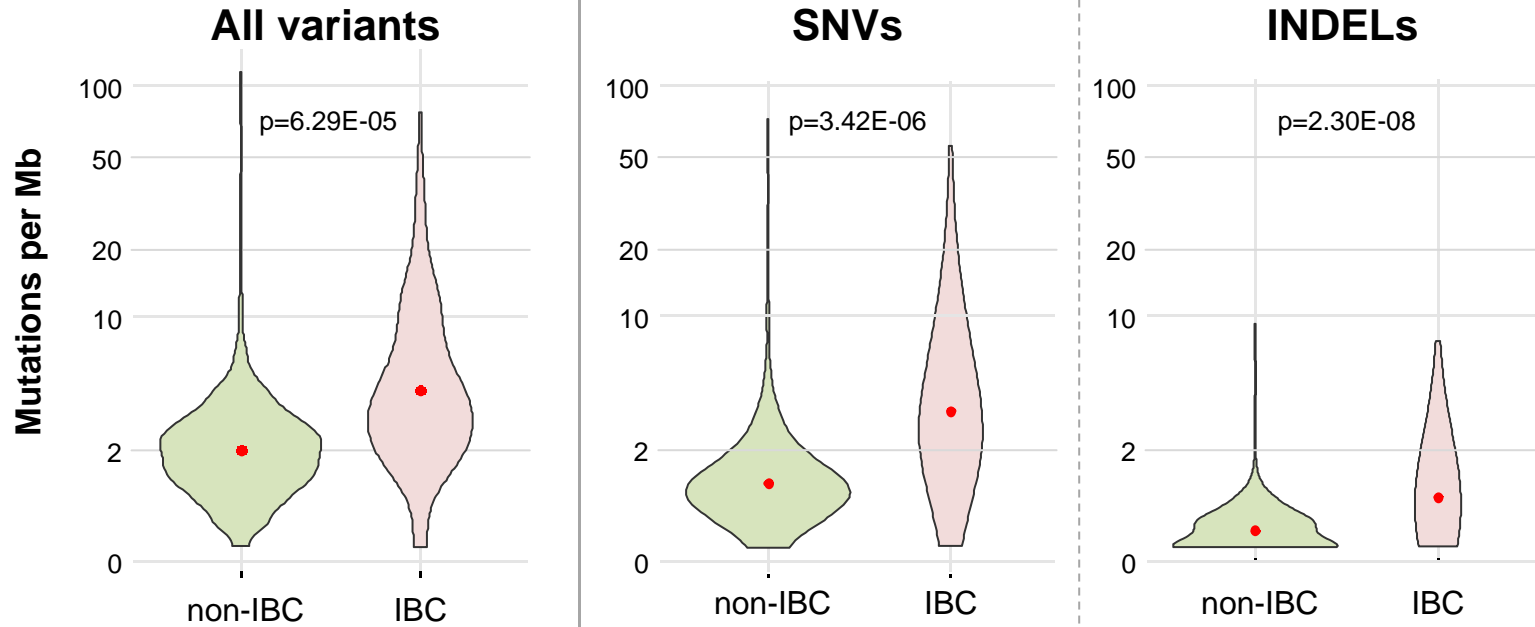

B

| TMB                         | Multivariate |                   |          | N    | Multivariate     |                   |         | N                | Multivariate |                   |         |
|-----------------------------|--------------|-------------------|----------|------|------------------|-------------------|---------|------------------|--------------|-------------------|---------|
|                             | N            | Odds-ratio [CI95] | p-value  |      | N                | Odds-ratio [CI95] | p-value |                  | N            | Odds-ratio [CI95] | p-value |
| IBC vs. nIBC                | 1797         | 363.8 [93-1427]   | 1.82E-12 | 1817 | 117.6 [52-267]   | 2.97E-21          | 1817    | 2.03 [1.82-2.26] | 2.31E-26     |                   |         |
| WES vs. targeted            | 1797         | 1.68 [1.09-2.58]  | 4.65E-02 | 1817 | 2.54 [1.91-3.39] | 9.20E-08          | 1817    | 1.09 [1.05-1.13] | 2.21E-04     |                   |         |
| HER2+ vs. HR+/HER2-         | 1797         | 2.15 [1.23-3.76]  | 2.49E-02 | 1817 | 1.89 [1.31-2.75] | 4.63E-03          | 1817    | 1.02 [0.97-1.07] | 5.54E-01     |                   |         |
| TN vs. HR+/HER2-            |              | 1.3 [0.76-2.21]   | 4.16E-01 |      | 1.29 [0.91-1.83] | 2.37E-01          |         | 1.07 [1.02-1.12] | 1.44E-02     |                   |         |
| AJCC stage, III-IV vs. I-II | 1797         | 0.76 [0.39-1.45]  | 4.81E-01 | 1817 | 0.83 [0.53-1.28] | 4.71E-01          | 1817    | 0.96 [0.91-1.02] | 2.66E-01     |                   |         |
