# Supplementary material for: NOTCH and DNA repair pathways are more frequently targeted by genomic alterations in inflammatory than in non‐inflammatory breast cancers
Source: PubMed Central journal article supplement (PMC7053236; doi:10.1002/1878-0261.12621), 2020-02-05

Figure S2

OR in the current MV analysis in the whole series

OR in the MV analysis redone in the samples informative for the two definitions (41 IBC vs 1,732 non-IBC)

96 significant genes

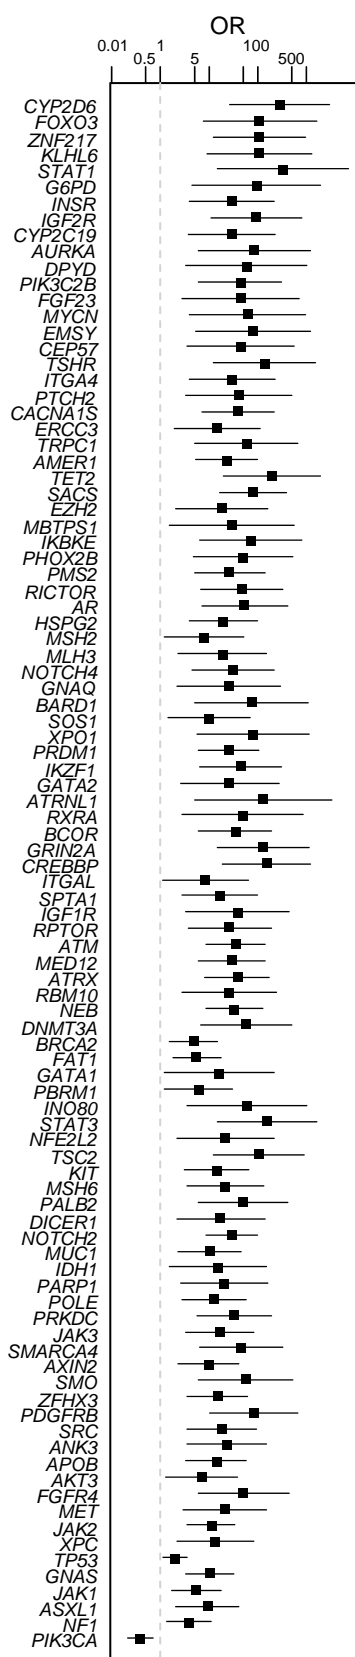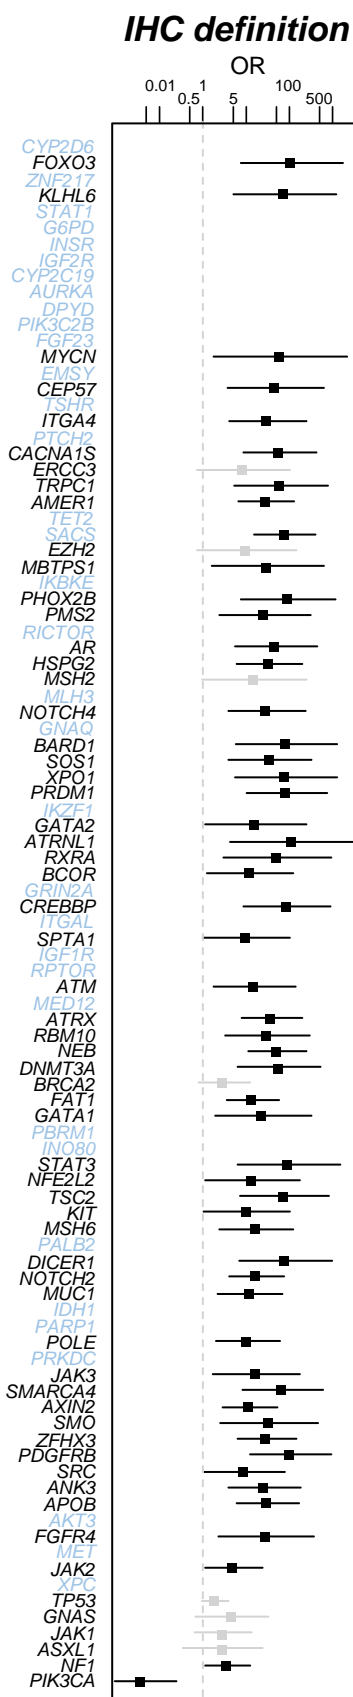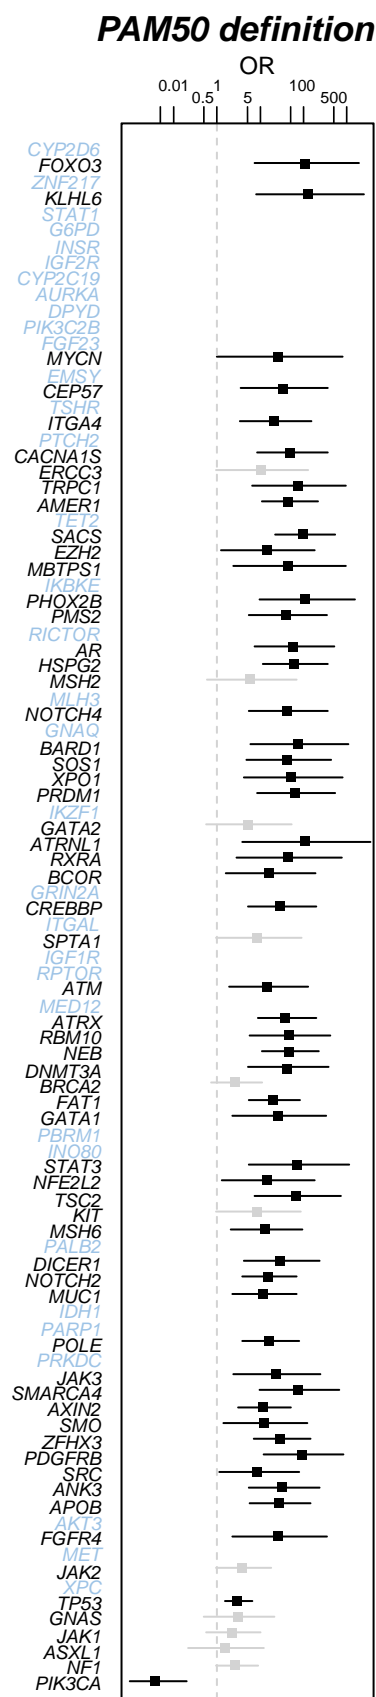

54 significant genes

51 significant genes

■ not significant

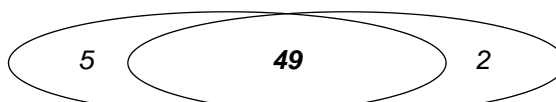

Supplement: MOL2-14-504-s002.pdf [file MOL2-14-504-s002.pdf]
