# Supplementary material for: NOTCH and DNA repair pathways are more frequently targeted by genomic alterations in inflammatory than in non‐inflammatory breast cancers
Source: PubMed Central journal article supplement (PMC7053236; doi:10.1002/1878-0261.12621), 2020-02-05
Supplement: MOL2-14-504-s004.pdf [file MOL2-14-504-s004.pdf]

# Figure S4

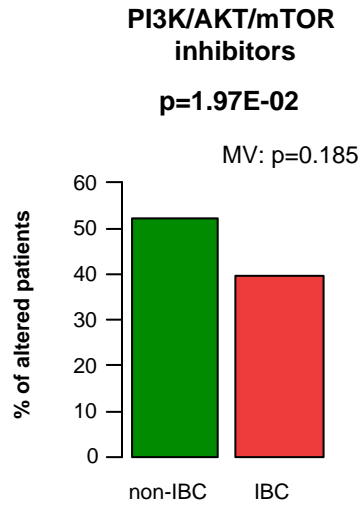

<https://www.mycancergenome.org/>  
 10 genes :  
 AKT1 PTEN  
 MTOR RICTOR  
 PIK3CA RNF43  
 PIK3R1 TSC1  
 PIK3R2 TSC2

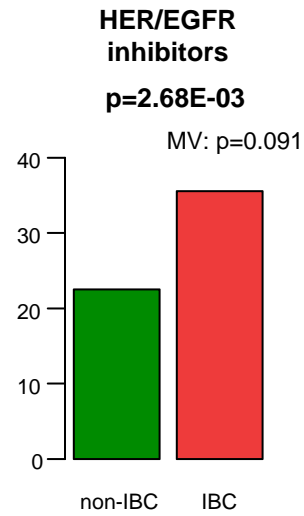

Brastianos, *Cancer Discov* 2015  
 4 genes :  
 ERBB2 ERBB4  
 ERBB3 EGFR

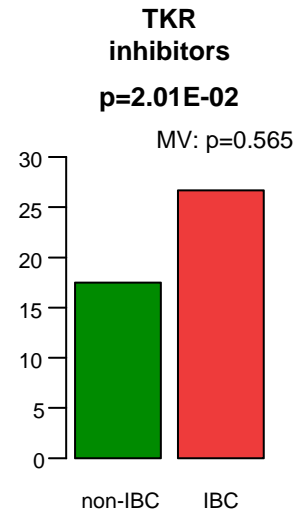

<https://www.genenames.org/>  
 12 genes :  
 ALK FGFR4  
 CSF1R KDR  
 DDR2 KIT  
 FGFR1 MET  
 FGFR2 RET  
 FGFR3 ROS1

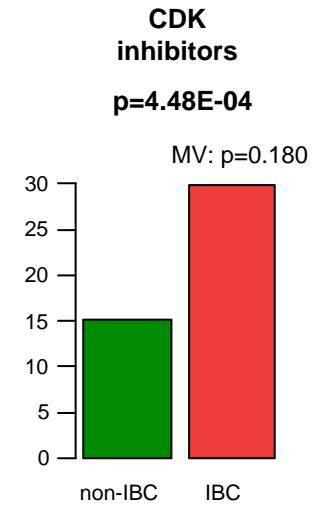

Brastianos, *Cancer Discov* 2015  
 8 genes:  
 CDKN2A CCND3  
 CCND1 RB1  
 CDK4 CDK6  
 CCNE1 CDKN1B
