# Supplementary material for: NOTCH and DNA repair pathways are more frequently targeted by genomic alterations in inflammatory than in non‐inflammatory breast cancers
Source: PubMed Central journal article supplement (PMC7053236; doi:10.1002/1878-0261.12621), 2020-02-05
Supplement: MOL2-14-504-s005.pdf [file MOL2-14-504-s005.pdf]

A

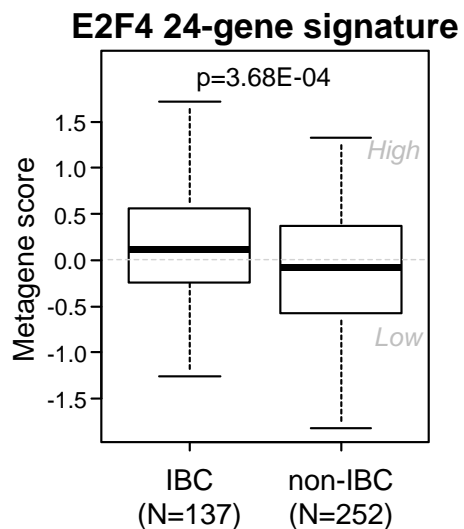

|                     | N   | IBC      | non-IBC   | p-value  | Statistic   |
|---------------------|-----|----------|-----------|----------|-------------|
| E2F4 24-g signature |     |          |           | 5.93E-03 | 0.55        |
| low                 | 196 | 56 (41%) | 140 (56%) |          | [0.35-0.86] |
| high                | 193 | 81 (59%) | 112 (44%) |          |             |

| IBC vs. non-IBC, glm         | N   | Multivariate OddsRatio [CI95] | pvalue   |
|------------------------------|-----|-------------------------------|----------|
| E2F4 24-g signature          | 384 | 0.659 [0.46-0.942]            | 5.50E-02 |
| Subtype, HER2+ vs. HR+/HER2- | 384 | 0.632 [0.36-1.11]             | 0.178    |
| TN vs. HR+/HER2-             | 384 | 0.868 [0.473-1.59]            | 0.702    |
| AJCC stage, III-IV vs. I-II  | 384 | 2.2E-09 [0e+00-Inf]           | 0.981    |

B

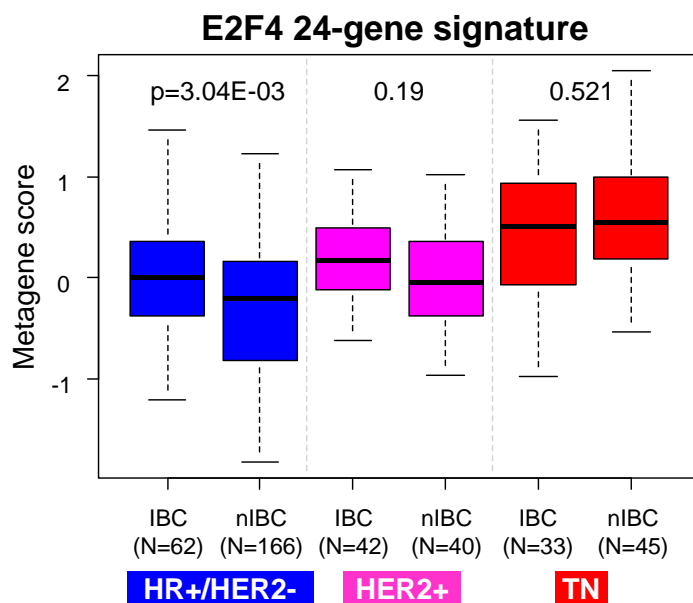

|                                      | N   | IBC      | non-IBC   | p-value  | Statistic   |
|--------------------------------------|-----|----------|-----------|----------|-------------|
| <b>HR+/HER2-</b> E2F4 24-g signature |     |          |           | 3.35E-02 | 0.52        |
| <b>HR+/HER2-</b> low                 | 140 | 31 (50%) | 109 (66%) |          | [0.28-0.99] |
| <b>HR+/HER2-</b> high                | 88  | 31 (50%) | 57 (34%)  |          |             |
| <b>HER2+</b> E2F4 24-g signature     |     |          |           | 0.267    | 0.56        |
| <b>HER2+</b> low                     | 37  | 16 (38%) | 21 (52%)  |          | [0.21-1.46] |
| <b>HER2+</b> high                    | 45  | 26 (62%) | 19 (48%)  |          |             |
| <b>TN</b> E2F4 24-g signature        |     |          |           | 0.588    | 1.5         |
| <b>TN</b> low                        | 18  | 9 (27%)  | 9 (20%)   |          | [0.45-4.95] |
| <b>TN</b> high                       | 60  | 24 (73%) | 36 (80%)  |          |             |
