# Supplementary material for: NOTCH and DNA repair pathways are more frequently targeted by genomic alterations in inflammatory than in non‐inflammatory breast cancers
Source: PubMed Central journal article supplement (PMC7053236; doi:10.1002/1878-0261.12621), 2020-02-05

Figure S7

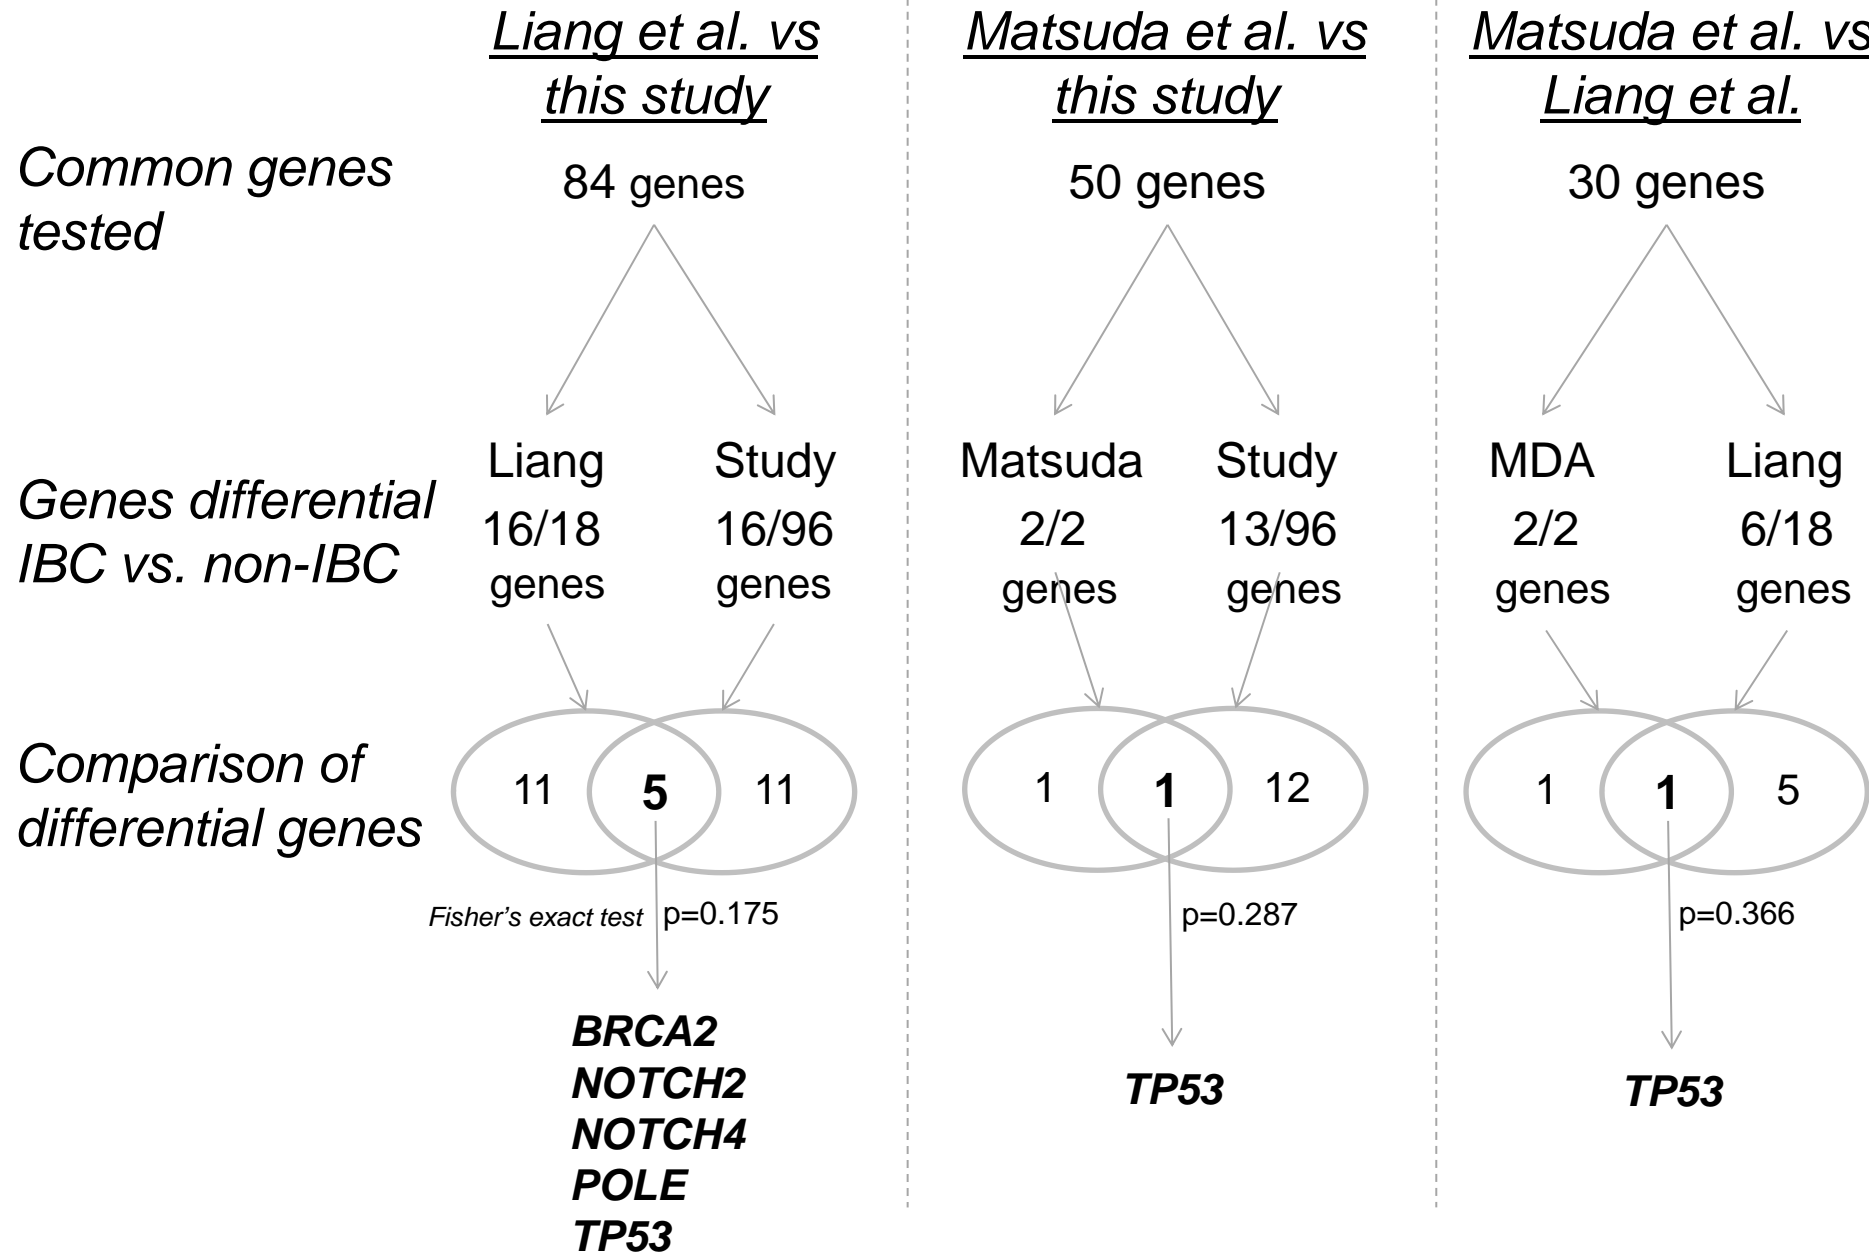

Supplement: MOL2-14-504-s007.pdf [file MOL2-14-504-s007.pdf]
